# Supplementary material for: Human intestinal bitter taste receptors regulate innate immune responses and metabolic regulators in obesity
Source: PubMed Central journal article supplement (PMC8803326; doi:10.1172/jci144828), 2022-02-01
Supplement: jci-132-144828-s166.pdf [file jci-132-144828-s166.pdf]

## Supplemental Tables

**Supplemental Table 1.** Demographics of lean and obese subjects

| <b>Parameter</b>              | <b>Lean (n=9)</b> | <b>Obese (n=42)</b> | <b>Lean vs Obese</b> |
|-------------------------------|-------------------|---------------------|----------------------|
| <b>Male/Female</b>            | 7/2               | 8/34                | <i>P</i> <0.001      |
| <b>Age (years)</b>            | 57±3              | 47±2                | <i>P</i> <0.05       |
| <b>BMI (kg/m<sup>2</sup>)</b> | 23.9±1.1          | 40.8±0.7            | <i>P</i> <0.001      |

**Supplemental Table 2.** Primers used in qPCR

| <b>Genes</b>                   | <b>Forward primer</b>      | <b>Reverse primer</b>   | <b>Size (bp)</b> |
|--------------------------------|----------------------------|-------------------------|------------------|
| <i>TAS2R4</i>                  | GCAGTGCTGGTTTGTGACC        | GCGTGATGTACAGGCAAGTG    | 168              |
| <i>TAS2R5</i>                  | ACACTCATGGCAGCCTATCC       | CGAGCACACACTGTCTTCCA    | 107              |
| <i>TAS2R7</i>                  | GCAGGTGTGGATGTCAAACCTC     | TCTTGACCCAGTCCATGCAG    | 167              |
| <i>TAS2R8</i>                  | ATGTGGATTACCACCTGCCT       | GGAAATGGCAAAGCATCCCAG   | 135              |
| <i>TAS2R10</i>                 | CCTTTGGAGACACAACAGGC       | GACCCCAGGGATAGATGGCT    | 221              |
| <i>TAS2R13</i>                 | GAAAGTGCCCTGCCGAGTAT       | CCAGATCAGCCCAATTCTGGA   | 177              |
| <i>TAS2R14</i>                 | CCAGGTGATGGGAATGGCTTA      | AGGGCTCCCCATCTTTGAAC    | 128              |
| <i>TAS2R16</i>                 | ATGGCATCACTGACCAAGCA       | TTCAACGTAGGGCTGCTCA     | 255              |
| <i>TAS2R20</i>                 | ATTTGGGGGAACAAGACGCT       | ACTACGGAAAACTTGTGGGAA   | 183              |
| <i>TAS2R30</i>                 | GGCTGGAAAAGCAACCTGTC       | ACACAATGCCCTCTTGTGA     | 191              |
| <i>TAS2R31</i>                 | TTGAGGAGTGCAGTGTACCTTTC    | ACGGCACATAACAAGAGGAAAA  | 218              |
| <i>TAS2R38</i>                 | AGGCCACATTAAGCCCTC         | CAGCTCTCCTCAACTTGGA     | 216              |
| <i>TAS2R39</i>                 | TTCTGTGGCTGTCCGTGTTTA      | GGGTGGCTGTCAGGATGAAC    | 207              |
| <i>TAS2R40</i>                 | CGGTGAACACAGATGCCACAGATA   | GTGTTTTGCCCTGGCCCACT    | 150              |
| <i>TAS2R43</i>                 | ATATCTGGGCAGTGATCAACC      | CCCAACAACATCACCAGAATGAC | 148              |
| <i>TAS2R46</i>                 | ACATGACTTGGAAGATCAAACCTGAG | AGCTTTTATGTGGACCTTCATGC | 200              |
| <i>RPS11</i>                   | CAGCCGACCATCTTTCAAAAC      | TCTCGAAGCGGTTGTACTTG    | 274              |
| <i>RPS18</i>                   | ACCAACATCGATGGGCGGCG       | TGGTGATCACACGTTCCACCTCA | 157              |
| <i>GAPDH</i>                   | AGGTGAAGGTCGGAGTCA         | GGTCATTGATGGCAACAA      | 99               |
| <i>DEFA5</i>                   | GCCATCCTTGCTGCCATTC        | TGATTTACACACCCCCGGAGA   | 241              |
| <i>DEFA6</i>                   | CCTCACCATCCTCACTGCTGTTT    | CCATGACAGTGCAGGTCCCATA  | 266              |
| <i>DEFB1</i>                   | ATGAGAACTTCTACCTTCTG       | TCACTTGCAGCACTTGCC      | 207              |
| <i>DEFB4A</i>                  | CCAGCC ATCAGCCATGAGGGT     | GGAGCCCTTTCTGAAT CCGCA  | 255              |
| <i>MUC1</i>                    | CATTGCCTTGGCTGTCTGTC       | GCGACGTGCCCTACAAG       | 246              |
| <i>MUC2</i>                    | CAGCACCGATTGCTGAGTTG       | GCTGGTCATCTCAATGGCAG    | 140              |
| <i>TAS2R43-<br/>Sequencing</i> | CCAGTCTGGTAGTGGTTACA       | TCACCCAGTACCTCATTTGCC   | 876              |
| <i>GDF-15</i>                  | TCCAGACCTATGATGACTTGT      | AACCTTGAGCCCATTCCA      | 127              |

## Supplemental Figures

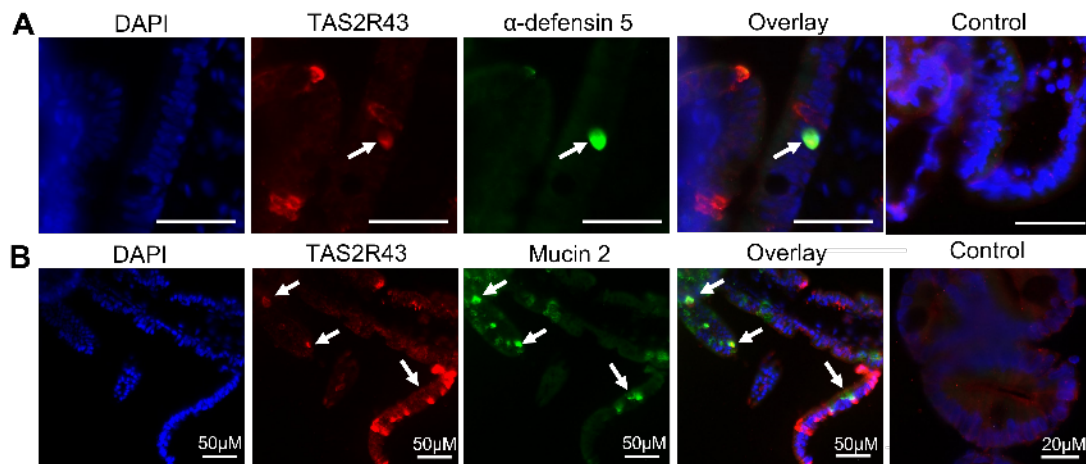

**Supplemental Figure 1. Co-localization of TAS2R43 with Paneth or goblet cells in tissue sections from a lean subject.** Representative double-immunofluorescence staining of jejunal tissue sections from a lean organ donor for TAS2R43 (red) and (A)  $\alpha$ -defensin 5, Paneth cells, or (B) mucin 2, goblet cells, (green). Nuclei were stained by DAPI (blue). Scale bars, (A) 50  $\mu$ m or (B) as indicated. Co-localization was performed in sections from two lean subjects.

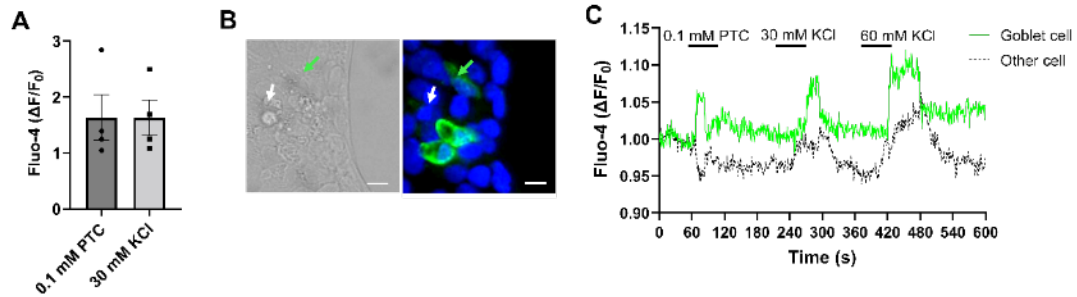

**Supplemental Figure 2. Intracellular  $\text{Ca}^{2+}$  changes in response to PTC and identification of cells in crypts from obese patients by immunostaining.** (A) Relative rise in fluorescence intensity in single cells from primary jejunal crypts from obese patients treated with 0.1 mM PTC or 30 mM KCl. Data represent the mean $\pm$ SEM, n=4 obese subjects. (B) The left picture shows the cells in brightfield of which the tracings of the  $\text{Ca}^{2+}$  changes are depicted. The right picture shows the immunofluorescent staining for mucin 2, a marker for goblet cells. (C) Tracing of a goblet cell responding to 0.1 mM PTC with a  $\text{Ca}^{2+}$  increase and a non-identified, non-responding cell. Scale bars=20  $\mu\text{M}$ .

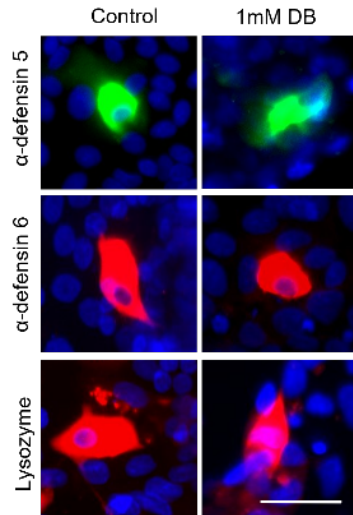

**Supplemental Figure 3. Immunofluorescence study of the effect of DB on protein expression in Paneth cells in a lean subject.** Representative immunofluorescence staining for  $\alpha$ -defensin 5,  $\alpha$ -defensin 6 and lysozyme after 30 min treatment of jejunal crypts from a lean patient with DMEM or 1mM DB. No difference between control and 1 mM DB treatment was detected. Scale bar, 25 $\mu$ m.

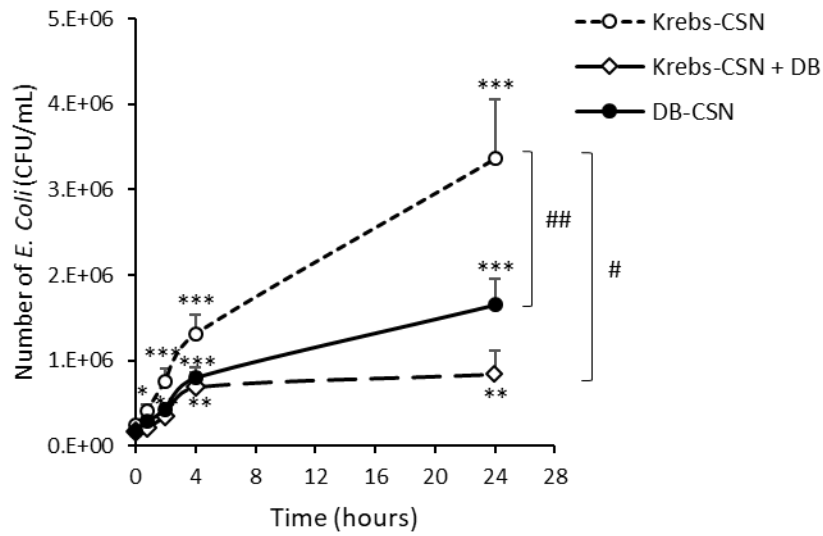

**Supplemental Figure 4. Bacteriostatic effects of DB on *E. coli* growth.** Time-dependent effect of the supernatant of jejunal crypts from obese patients stimulated for 4 hours with Krebs (Krebs-CSN) or DB (DB-CSN) on colony forming units (CFU) of *E. coli* and their bacteriostatic control (Krebs-CSN + DB). Data represent the mean $\pm$ SEM, (n=4-6). Statistics: mixed model over time \*:  $P < 0.05$ , \*\*:  $P < 0.01$ , \*\*\*:  $P < 0.001$ , vs. 0h; #:  $P < 0.05$ , ##:  $P < 0.01$ , vs. Krebs-CSN.

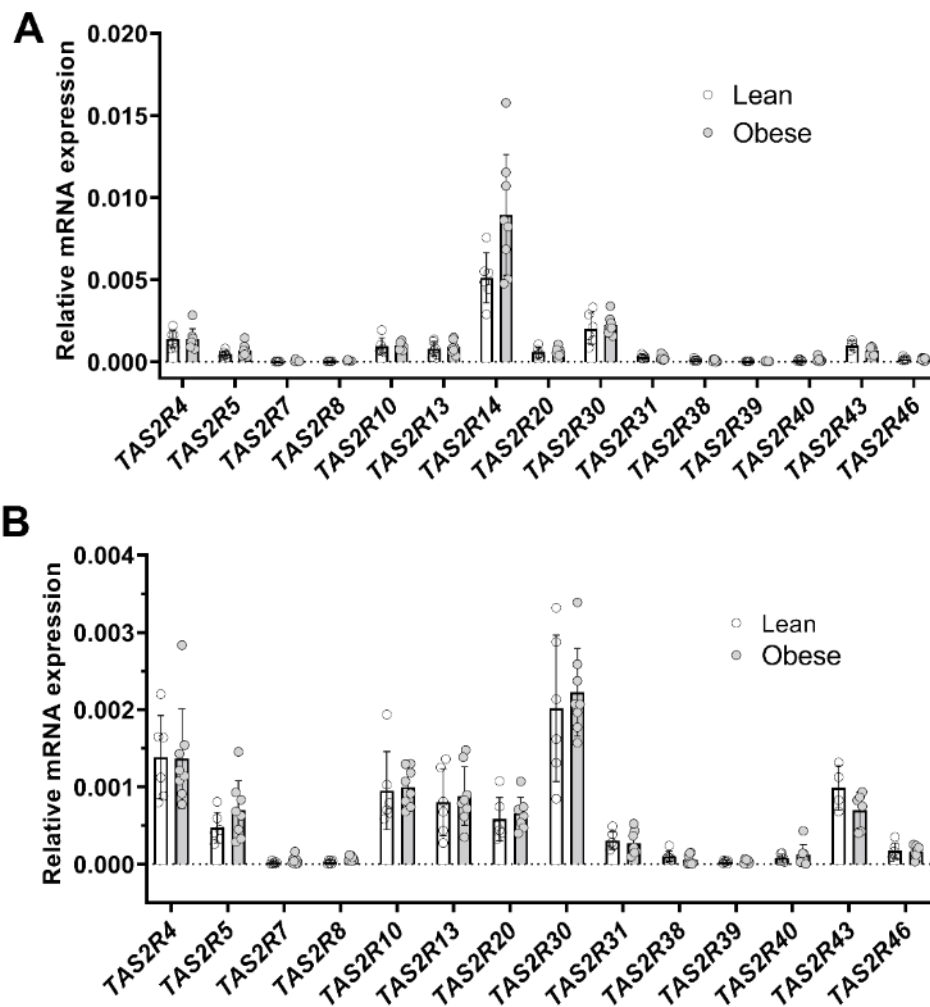

**Supplemental Figure 5. Relative mRNA expression of TAS2Rs in crypts derived from either lean or obese subjects.** (A and B) Relative mRNA expression of single TAS2Rs in primary jejunal crypts from lean (n=4-6) and obese (n=6-8) subjects normalized to the expression of the endogenous controls RPS18, GAPDH and RPS11. (B) Detail of (A) excluding TAS2R14. Data represent the mean $\pm$ SEM. Statistics: Mixed model lean vs. obese. No significant differences between the expression of TAS2Rs in lean vs. obese was detected.

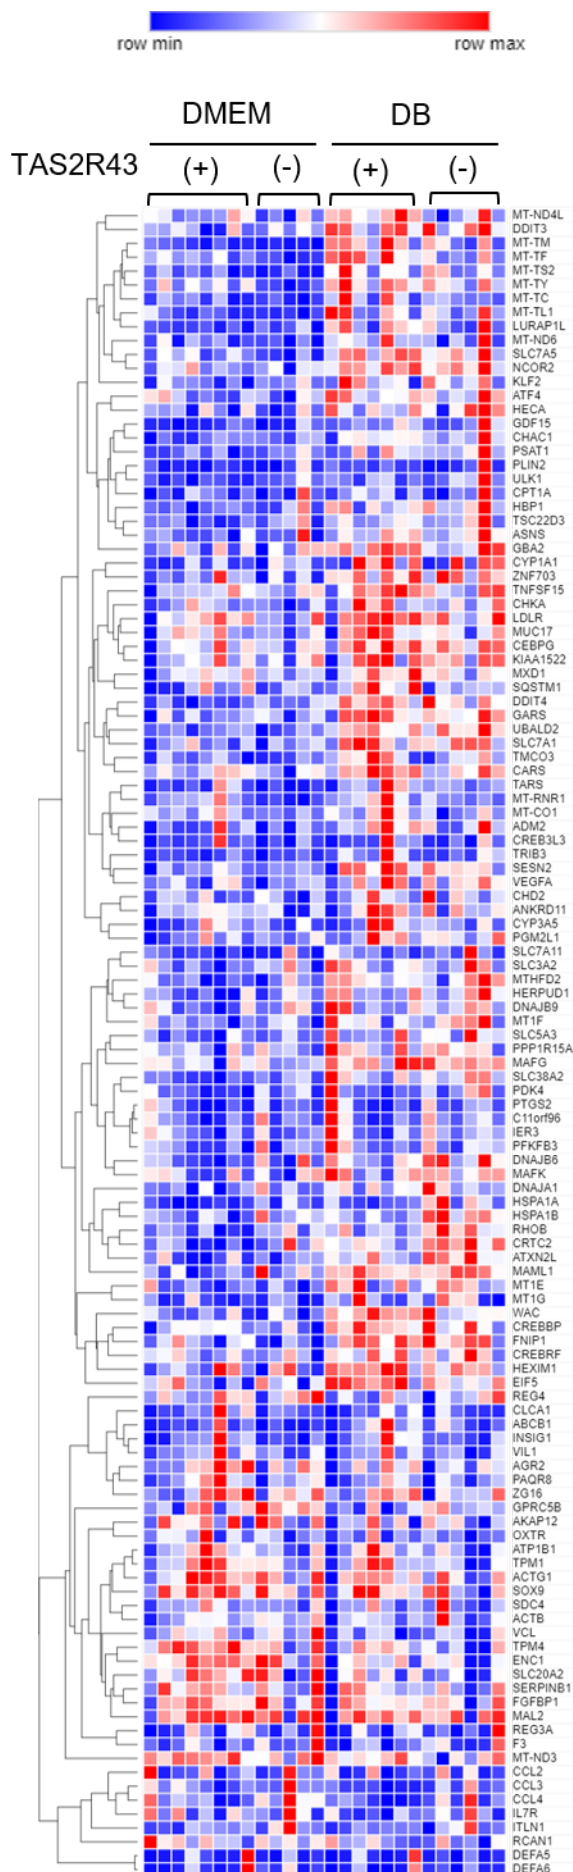

**Supplemental Figure 6. Heatmap of the 120 identified DEGs identified in jejunal crypts from obese TAS2R43(+) and TAS2R43(-) patients after 4 hours treatment with DMEM or 1mM DB. Hierarchical clustering was conducted by one minus Pearson correlation, linkage method average, with the heatmapping tool Morpheus of the Broad Institute.**



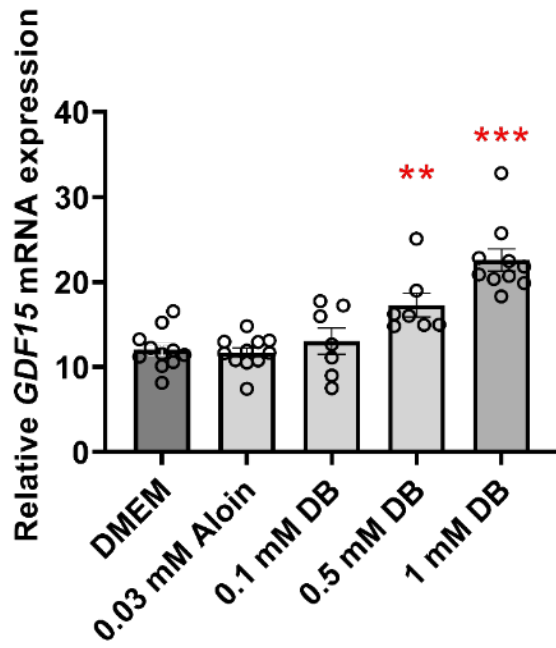

**Supplemental Figure 7. Effect of bitter agonists on *GDF15* mRNA expression in crypts from obese patients.** Concentration-dependent effect of treatment of jejunal crypts from obese patients (n=7-11) for 4 hours with DB (0.1-1 mM) on relative *GDF15* mRNA expression. Treatment with 0.03 mM aloin for 4h had no effect on *GDF15* mRNA expression. Data represent the mean±SEM. Statistics: mixed model. \*\*:  $P < 0.01$ , \*\*\*:  $P < 0.001$ , vs. DMEM.

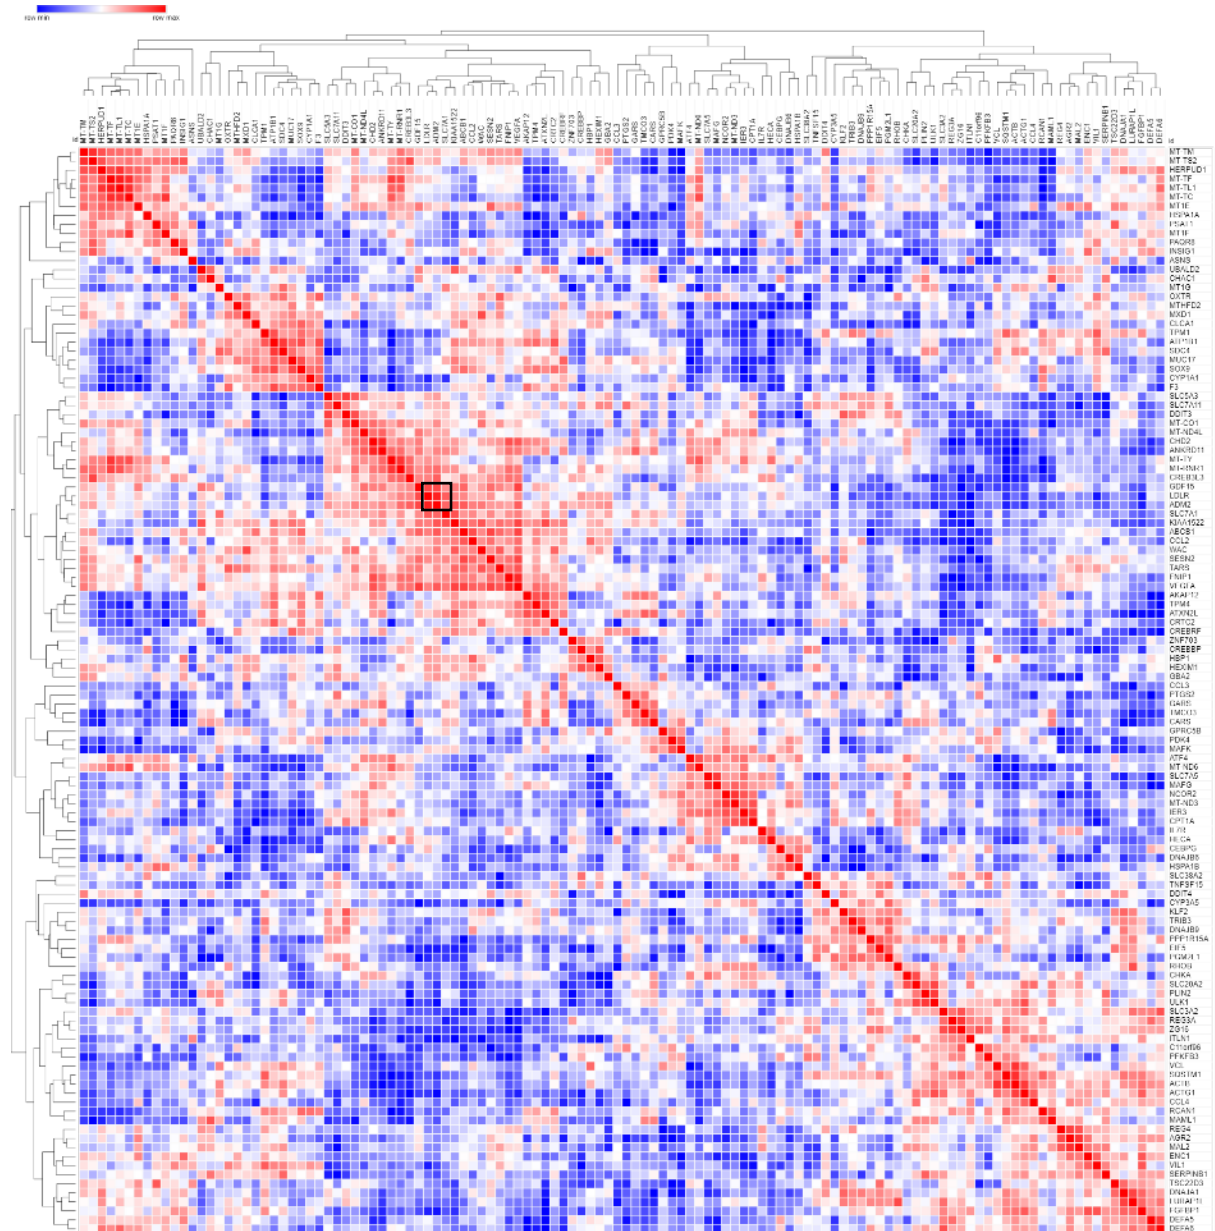

**Supplemental Figure 8. Correlation matrix of the fold changes of 120 identified DEGs in response to DB in jejunal crypts from obese patients. The most significantly upregulated gene *GDF15* significantly correlated with *ADM2* and *LDLR*, position indicated by a black square (Pearson *r*).**

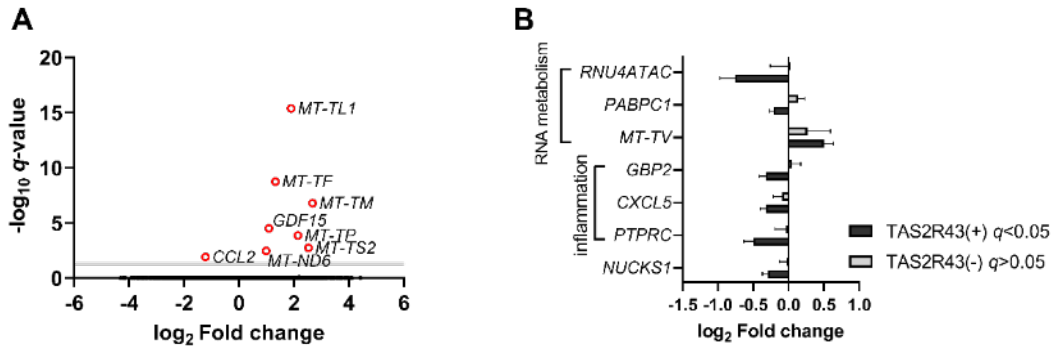

**Supplemental Figure 9. Transcriptomic analysis of jejunal crypts from lean or obese subjects stimulated with DB. (A)** Volcano plot showing the log<sub>2</sub> fold changes (DB-DMEM) of significantly DEGs indicated in red, after treatment of crypts derived from lean subjects (n=4) with 1 mM DB or DMEM (control). **(B)** Comparison of the log<sub>2</sub> fold changes of the 7 DEGs identified only in the data set of the TAS2R43(+) obese subjects (n=7-8) after treatment with 1 mM DB vs TAS2R43(-) (n=5-6).
